## 1 **A genome-wide association study of mammographic texture variation**

2 Yuxi Liu<sup>1,2</sup>, Hongjie Chen<sup>3</sup>, John Heine<sup>4</sup>, Sara Lindstroem<sup>3,5</sup>, Constance Turman<sup>1</sup>, Erica T.  
3 Warner<sup>6</sup>, Stacey J. Winham<sup>7</sup>, Celine M. Vachon<sup>8</sup>, Rulla M. Tamimi<sup>9,10</sup>, Peter Kraft<sup>1,2,11,\*</sup>, Xia  
4 Jiang<sup>12,13,\*</sup>

- 5 1. Department of Epidemiology, Harvard T.H. Chan School of Public Health, Boston, MA,  
6 USA
- 7 2. Program in Genetic Epidemiology and Statistical Genetics, Harvard T.H. Chan School of  
8 Public Health, Boston, MA, USA
- 9 3. Department of Epidemiology, University of Washington, Seattle, WA, USA
- 10 4. Division of Population Sciences, H. Lee Moffitt Cancer Center & Research Institute, Tampa,  
11 FL, USA
- 12 5. Public Health Sciences Division, Fred Hutchinson Cancer Research Center, Seattle, WA,  
13 USA
- 14 6. Clinical and Translational Epidemiology Unit, Department of Medicine, Mongan Institute,  
15 Massachusetts General Hospital and Harvard Medical School, Boston, MA, USA
- 16 7. Biomedical Statistics and Informatics, Mayo Clinic, Rochester, MN, USA
- 17 8. Division of Epidemiology, Department of Quantitative Health Sciences, Mayo Clinic,  
18 Rochester, MN, USA
- 19 9. Channing Division of Network Medicine, Department of Medicine, Brigham and Women's  
20 Hospital and Harvard Medical School, Boston, MA, USA
- 21 10. Department of Population Health Sciences, Weill Cornell Medicine, New York, NY, USA
- 22 11. Department of Biostatistics, Harvard T.H. Chan School of Public Health, Boston, MA, USA

23 12. Department of Clinical Neuroscience, Centre for Molecular Medicine, Karolinska Institute,  
24 Stockholm, Sweden

25 13. West China School of Public Health and West China Fourth Hospital, Sichuan University,  
26 Chengdu, China

27 \* Corresponding authors:

28 Peter Kraft, PhD. Program in Genetic Epidemiology and Statistical Genetics, Harvard T.H. Chan  
29 School of Public Health, 655 Huntington Avenue, Building 2-249A, Boston, MA, 02115. Email:  
30 [pkraft@hsph.harvard.edu](mailto:pkraft@hsph.harvard.edu)

31 Xia Jiang, PhD. Department of Clinical Neuroscience, Center for Molecular Medicine,  
32 Karolinska Institutet, Visionsgatan 18, Solna 171 77, Stockholm, Sweden. E-mail:  
33 [xia.jiang@ki.se](mailto:xia.jiang@ki.se)

34

35

36

37

38

39

40

41

## 42 Abstract

43 **Background:** Breast parenchymal texture features, including gray scale variation (V), capture  
44 the patterns of texture variation on a mammogram and are associated with breast cancer risk,  
45 independent of mammographic density (MD). However, our knowledge on the genetic basis of  
46 these texture features is limited.

47 **Methods:** We conducted a genome-wide association study of V in 7,040 European-ancestry  
48 women. Four V assessments representing different amounts of breast edge erosion and image  
49 resolutions were generated from digitized film mammograms. We used linear regression to test  
50 the single-nucleotide polymorphism (SNP)-phenotype associations adjusting for age, body mass  
51 index (BMI), MD phenotypes, and the top four genetic principal components. Multivariate  
52 phenotype association tests combining all four V assessments were performed. We further  
53 calculated genetic correlations and performed SNP-set tests of V with MD, breast cancer risk,  
54 and other breast cancer risk factors.

55 **Results:** We identified three genome-wide significant loci associated with V: rs138141444  
56 (6q24.1) in *ECT2L*, rs79670367 (8q24.22) in *LINC01591*, and rs113174754 (12q22) near  
57 *PGAMIP5*. 6q24.1 and 8q24.22 have not previously been associated with MD phenotypes or  
58 breast cancer risk, whilst 12q22 is a known locus for both MD and breast cancer risk. Among  
59 known MD and breast cancer risk SNPs, we identified four variants that were associated with V  
60 at the Bonferroni-corrected thresholds accounting for the number of SNPs tested: rs335189  
61 (5q23.2) in *PRDM6*, rs13256025 (8p21.2) in *EBF2*, rs11836164 (12p12.1) near *SSPN*, and  
62 rs17817449 (16q12.2) in *FTO*. We observed significant genetic correlations between V and  
63 mammographic dense area ( $r_g = 0.79$ ,  $P = 5.91 \times 10^{-5}$ ), percent density ( $r_g = 0.73$ ,  $P = 1.00 \times$

64  $10^{-4}$ ), and adult BMI ( $r_g = -0.36$ ,  $P = 3.88 \times 10^{-7}$ ). Additional significant relationships were  
65 observed for nondense area ( $z = -4.14$ ,  $P = 3.42 \times 10^{-5}$ ), estrogen receptor-positive breast cancer  
66 ( $z = 3.41$ ,  $P = 6.41 \times 10^{-4}$ ), and childhood body fatness ( $z = -4.91$ ,  $P = 9.05 \times 10^{-7}$ ) from the  
67 SNP-set tests.

68 **Conclusions:** These findings provide new insights into the genetic basis of mammographic  
69 texture variation and their associations with MD, breast cancer risk, and other breast cancer risk  
70 factors.

71

72 **Keywords:** Breast cancer, Breast parenchymal texture feature, Texture variation, V measure,  
73 Mammographic density, GWAS, Genetic correlation

74

75

76

77

78

79

80

81

## 82 **Background**

83 Mammographic density (MD) phenotypes reflect the amount of dense or nondense tissue on a  
84 mammogram and are well-established risk factors for breast cancer [1-3]. MD phenotypes are  
85 highly heritable with  $h^2 = 60-70\%$  from twin studies [4, 5]. Genome-wide association studies  
86 (GWAS) have identified 55 loci that are associated with MD phenotypes [6-8], including 32 loci  
87 for dense area (DA), which reflects the amount of fibroglandular tissue in the breast, 18 loci for  
88 nondense area (NDA), which reflects the amount of fatty tissue in the breast, and 24 loci for  
89 percent density (PD), defined as the percentage of area on a mammogram that is occupied by  
90 dense tissue [9].

91 Yet, MD is a global metric that ignores local patterns of variability in breast density [10].

92 Women with the same level of PD may have substantial heterogeneity in the structural patterns  
93 of breast parenchyma, which are assessed as texture features. Compared to MD phenotypes,  
94 breast parenchymal texture features are more refined and localized, and are fully automated  
95 measures of the variation in parenchymal patterns on a mammogram [11]. Growing evidence  
96 suggest that texture features are independent breast cancer risk factors [12-16]. Heine et al.  
97 developed a summary measure of texture features called V, which captures the gray scale  
98 variation on a mammogram [12]. Recent studies have shown that a higher value of V, reflecting  
99 greater texture variation, is associated with an increased risk of breast cancer, independent of  
100 MD [12, 16]. Understanding the mechanisms underlying texture variation and breast cancer risk,  
101 especially the role of genetic variants, would provide additional insights into the development of  
102 breast cancer. However, to date, no GWAS has been conducted on breast parenchymal texture  
103 features.

104 In the present study, we performed a GWAS of mammographic texture variation, including four  
105 different assessments of V, within the Nurses' Health Studies and Mayo Mammography Health  
106 Study cohorts. We also leveraged summary statistics of breast cancer risk and MD phenotypes  
107 from previous GWAS to identify shared susceptibility loci for V, MD, and breast cancer risk. We  
108 further assessed the genetic relationships of V with MD phenotypes, breast cancer risk, and other  
109 breast cancer risk factors by estimating genetic correlations and performing single-nucleotide  
110 polymorphism (SNP)-set tests.

111

112

113

114

115

116

117

118

119

120

121

## 122 **Methods**

### 123 **Study population**

124 The Nurses' Health Study (NHS) is a prospective cohort study established in 1976. A total  
125 number of 121,700 female registered nurses aged 30 to 55 residing in 11 states within the United  
126 States completed an initial questionnaire at that time. NHSII was established in 1989 when  
127 116,671 female registered nurses aged 25 to 42 residing in 14 states completed an initial  
128 questionnaire. Blood samples were collected from 32,826 women in NHS cohort from 1989 to  
129 1990 and 29,611 women in NHSII cohort from 1996 to 1999, which form the blood subcohorts.  
130 Women in each cohort have been followed by self-administered questionnaires to collect updated  
131 exposure and newly diagnosed disease information every two years.

132 The Mayo Mammography Health Study (MMHS) is a prospective cohort study of 19,924 women  
133 who had a screening mammogram from 2003 to 2006 at the Mayo Clinic in Rochester, MN and  
134 agreed to participate in the study. Participants were at least 35 years old, residents of Minnesota,  
135 Iowa, or Wisconsin, and had no personal history of breast cancer. Participants completed a  
136 baseline questionnaire and provided consent to access any residual blood samples from clinical  
137 tests over the time period. Breast cancer diagnostic information were obtained through linkage to  
138 state-wide cancer registry data and mailed questionnaires.

### 139 **Mammogram collection and processing**

140 The mammogram collection and processing procedure in NHS and NHSII is described elsewhere  
141 [16, 17] and is briefly summarized here. Pre-diagnostic screening mammograms were collected  
142 within NHS and NHSII breast cancer case-control studies nested in the blood subcohorts [18]. A

143 total number of 6,258 film mammograms obtained close to the blood draw date were initially  
144 collected. The study protocol was approved by the institutional review boards of the Brigham  
145 and Women’s Hospital and Harvard T.H. Chan School of Public Health. Film mammogram  
146 craniocaudal views of both breasts were digitized using a Lumysis 85 laser film scanner or a  
147 VIDAR CAD PRO Advantage scanner (VIDAR Systems Corporation, Herndon, VA, USA).  
148 Digitized images were grouped based on resolution (mean resolution = 171 $\mu$ m, 232 $\mu$ m, 300 $\mu$ m,  
149 and images with isolated resolutions). Here, we evaluated the groups of images with average  
150 resolutions of 171 $\mu$ m (high resolution) and 300 $\mu$ m (low resolution). Images with isolated  
151 resolutions were down-sampled to 300 $\mu$ m and added to the low resolution group. All 171 $\mu$ m  
152 images were further adjusted to 300 $\mu$ m to form a larger dataset of low-resolution images.

153 Details of mammogram acquisition, retrieval, and digitization for MMHS are described  
154 elsewhere [12, 19]. Briefly, women in MMHS who agreed to participate provided written  
155 informed consent to access their mammograms. A total number of 19,924 women were followed  
156 up for incident cancer events. We used a case-cohort design with a random sample of 2,300  
157 women from the entire MMHS cohort as the subcohort. We collected film mammograms from  
158 1,194 breast cancer cases identified through August 2019, excluding women who were  
159 diagnosed within 60 days of the enrollment mammogram and women with a digital mammogram.  
160 We further collected mammograms from 2,167 control women from the subcohort. The study  
161 protocol was approved by the Mayo Clinic institutional review board. Film mammograms of  
162 both craniocaudal views were digitized on the Array 2905 laser digitizer (Array Corporation,  
163 Roden, The Netherlands) with 50 $\mu$ m (limiting) pixel spacing and further downsampled to 200 $\mu$ m.  
164 Both the original 50 $\mu$ m images (high resolution) and the down-sampled 200 $\mu$ m images (low  
165 resolution) were used for calculation of V.



166 **Assessment of V**

167 V is an automated measure of the gray scale variation on a mammogram. The algorithm for  
168 generating V has been described previously by Heine et al. [12, 20, 21]. Briefly, there are three  
169 main steps: segmentation, erosion, and calculation of variation. First, the breast is segmented  
170 from the background. Then, the segmented breast area is eroded by 25% or 35% along a radial  
171 direction to retain the regions where the breast was in contact with the compression paddle.  
172 Finally, the V is calculated as the standard deviation of the pixel values within the eroded breast  
173 region. Normalization processes, including spatial normalization, feature distribution  
174 normalization, and resolution estimation, were applied to the images before calculation of V to  
175 account for resolution and intensity scale differences [17].

176 We generated four assessments of V with different proportions of erosion and image resolutions:  
177 V with 35% erosion and low resolution (V65L), V with 25% erosion and low resolution (V75L),  
178 V with 35% erosion and high resolution (V65H), and V with 25% erosion and high resolution  
179 (V75H). These four V assessments were highly correlated with each other (Fig. 1a). We used  
180 V65L as our primary univariate outcome, as it had the largest sample size.

181 **MD phenotypes and other covariates**

182 MD phenotypes were assessed from digitized film mammograms using Cumulus [22], a semi-  
183 automated software, by a single trained reader [12, 23]. DA and NDA were generated for each  
184 mammogram; PD was calculated as DA divided by the total breast area. DA, NDA, and PD  
185 measures in the left and right breasts were averaged. Fig. 1b shows the scatter plots and  
186 correlations of V65L and the three MD phenotypes. Body mass index (BMI) was measured at  
187 mammogram collection for all participants. Women were considered as breast cancer cases if

188 they were diagnosed with breast cancer after blood or mammogram collection but before June 1,  
189 2004 (NHS), June 1, 2007 (NHSII), or August 2019 (MMHS). Age at mammogram collection  
190 was also retrieved.

### 191 **Genotyping, quality control, and imputation**

192 The full genotyping and quality control pipeline for NHS and NHSII is described elsewhere [24].  
193 In the present study, we used genotype data from four platforms: Affymetrix 6.0, Illumina  
194 HumanHap, Illumina OmniExpress, and Illumina OncoArray. Variants with call rate < 95% or  
195 Hardy-Weinberg equilibrium  $P < 1 \times 10^{-6}$  were excluded. European ancestry principal  
196 component (PC) outliers or samples with call rate < 90%, gender discordance, or extreme  
197 heterozygosity were excluded.

198 The full genotyping and quality control pipeline for MMHS is also described elsewhere [25].  
199 Here, we used genotype data from iCOGS and OncoArray platforms. Variants with a call rate <  
200 95% or not in Hardy-Weinberg equilibrium were excluded. Samples with a call rate < 95%,  
201 extreme heterozygosity, or of non-European ancestry based on genetic PCs were further  
202 excluded.

203 All genotype data were imputed to the 1000 Genomes Phase 3 version 5 reference panel  
204 separately by study and platform [26]. Number of individuals included in our GWAS by study  
205 and platform can be found in Additional file 1: Table S1.

### 206 **Association test**

207 All four V assessments (V65L, V75L, V65H, and V75H) were standardized to have mean zero  
208 and unit standard deviation before analysis. SNP association analyses were performed within

209 each study by platform for each of the four V assessments using linear regression assuming an  
210 additive dosage effect. RVtests [27] was used for NHS/NHSII cohorts (Axiom 6.0, Illumina  
211 HumanHap, Illumina OmniExpress, and Illumina OncoArray) and variants were removed from  
212 individual platform results if the expected minor allele counts were below 10. PLINK 2.0 [28]  
213 was used for MMHS cohorts (iCOGS and OncoArray). We ran six models adjusting for different  
214 covariates: Model 0 was the base model adjusting for age and the top four genetic PCs to account  
215 for population structure. Model 1 further adjusted for BMI. In addition to the covariates in Model  
216 1, Model 2 further adjusted for PD, Model 3 further adjusted for DA, and Model 4 further  
217 adjusted for NDA. Model 5 was the fully adjusted model with age, BMI, genetic PCs, PD, DA,  
218 and NDA as covariates. Fixed effect meta-analyses across studies and platforms were conducted  
219 for each V assessment and model using METAL [29]. Cochran's Q statistic was used to check  
220 for heterogeneity between studies and platforms. Quantile-quantile plots and genomic inflation  
221 factors were used to assess systematic inflation in test statistics due to population substructure.  
222 Manhattan plots were generated to visualize the overall GWAS results. LocusZoom plots [30] of  
223 the 1Mb region centered around the identified lead SNPs were generated to visualize the regional  
224 association results and nearby genes.

225 Given that the four V assessments were highly correlated with each other and might be proxies  
226 for an underlying latent phenotype, we performed multivariate phenotype association tests to  
227 pool association evidence across the four V assessments and get a single summary test statistic  
228 for each variant. We used R package MPAT [31] to obtain the summary *P* values and  
229 corresponding *Z* scores using test statistics from the meta-analysis results for each V assessment  
230 and model, accounting for sample overlaps of the four V assessments. We referred to this  
231 summary phenotype as VSUM, which was used as our primary multivariate outcome. SNPs with

232  $P < 5 \times 10^{-8}$  in any of the six models for any of the four univariate V assessments or the  
233 multivariate VSUM were considered genome-wide significant.

#### 234 **V, MD phenotypes, and breast cancer susceptibility variants**

235 We evaluated whether the identified V loci were also associated with MD phenotypes or breast  
236 cancer risk using GWAS results from Breast Cancer Association Consortium (BCAC) [8, 25, 32].  
237 To further identify shared susceptibility SNPs between V, MD phenotypes, and breast cancer  
238 risk, we conducted *in silico* lookups of 72 genome-wide significant MD phenotype SNPs  
239 identified by Sieh et al. [6] and Chen et al. [8], and 195 genome-wide significant breast cancer  
240 risk SNPs identified by Michailidou et al. [25] and Zhang et al. [32] in our GWAS of V. These  
241 candidate SNPs were considered significant for V if they passed the Bonferroni-corrected  
242 thresholds accounting for the number of MD ( $P < 0.05/72$ ) or breast cancer ( $P < 0.05/195$ ) SNPs  
243 tested in Model 0 for any V assessment.

#### 244 **Genetic correlation and SNP-set test**

245 Genetic correlations of the four V assessments and VSUM with MD phenotypes, breast cancer  
246 risk, overall and stratified by estrogen receptor (ER) status, adult BMI, childhood body fatness,  
247 age at menarche, and age at natural menopause were estimated using linkage disequilibrium (LD)  
248 score regression [33, 34]. Sources of summary statistics of these traits for estimating genetic  
249 correlations are summarized in Additional file 2: Table S2.

250 While genetic correlation quantifies the shared genetic contribution to two traits on genome-wide  
251 scale, it may also capture the contribution of other traits due to pleiotropy (e.g., the effect of BMI  
252 on the correlation between V and PD). Therefore, we further performed SNP-set tests to assess

253 the genetic relationship between V and the above-mentioned traits using only reported genome-  
254 wide significant SNPs for those traits. SNPs for each trait were collected from published GWAS  
255 followed by LD clumping to remove any SNPs in LD ( $r^2 > 0.1$ ) with SNPs of smaller  $P$  value  
256 (see Additional file 2: Table S3). The test statistic for V and each trait was

$$Z = \frac{\sum_n \text{sgn}(Z_V \cdot Z_{\text{Trait}}) \cdot |Z_V|}{\sqrt{n}}$$

257 where  $Z_V$  is the Z score from the SNP-specific association with V and  $Z_{\text{Trait}}$  is the Z score from  
258 the SNP-specific association with the trait of interest, and  $n$  is the total number of tested genome-  
259 wide significant SNPs for that trait.

## 260 **Sensitivity analysis**

261 Our study population contains both women who developed breast cancer and women who did  
262 not develop breast cancer during the follow-up period after mammogram collection. We  
263 therefore further adjusted for breast cancer case-control status in Model 5 to assess its impact on  
264 the genetic associations. We performed a multicollinearity check for the identified genome-wide  
265 significant SNPs for Model 5, where we adjusted for all three MD phenotypes, by calculating the  
266 variance inflation factor (VIF). To assess the potential impact of outliers on the association  
267 results at the identified GWAS loci, we calculated the studentized residuals for all samples for  
268 each genome-wide significant SNP. Samples with absolute studentized residual greater than 3  
269 were considered as outliers.

270

## 271 Results

272 Our GWAS meta-analysis of V comprised 7,040 women of European ancestry within the NHS,  
273 NHSII, and MMHS cohorts (Table 1). Women in MMHS were older, had higher BMI and lower  
274 MD compared to women in NHS and NHSII. Quantile-quantile plots and genomic inflation  
275 factors indicate there was no evidence of systematic inflation of the GWAS test statistics in any  
276 model for any V assessment (Additional file 2: Figure S1). Manhattan plots showing the  
277  $-\log_{10}(P)$  for all tested SNPs across chromosomes are present in Additional file 2: Figure S2.  
278 Quantile-quantile plots of the heterogeneity  $P$  value indicate there was limited evidence of  
279 heterogeneity in the test results across studies and platforms (Additional file 2: Figure S3).

280 In total, we identified three independent loci that reached the genome-wide significant threshold  
281 of  $P < 5 \times 10^{-8}$  in any model for any V assessment: 6q24.1 (*ECT2L*), 8q24.22 (*LINC01591*), and  
282 12q22 (*PGAMIP5*) (Table 2). 6q24.1 (Lead SNP: rs138141444,  $P = 1.24 \times 10^{-8}$  for V75H,  
283 Model 0) is a novel locus that has not previously been associated with MD phenotypes or breast  
284 cancer risk. Fig. 2a shows the regional association results for 6q24.1 from Model 0 (adjusting for  
285 age and genetic PCs) for V75H where the association was genome-wide significant. The  
286 association results were consistent across models with the same direction and similar effect sizes  
287 as well as  $P$  values. 8q24.22 (Lead SNP: rs79670367,  $P = 2.38 \times 10^{-8}$  for VSUM, Model 5) is  
288 neither a MD nor breast cancer risk locus. Fig. 2b shows the regional association results for  
289 8q24.22 from Model 5 (adjusting for age, BMI, DA, NDA, PD, and genetic PCs) for VSUM.  
290 The association between V and rs79670367 was more significant when we adjusted for PD  
291 (Model 2), DA (Model 3), or both (Model 5) and became less significant without adjustment for  
292 any MD phenotypes (Model 0 and 1) or adjusting for NDA only (Model 4). The direction of  
293 association was consistent across models. 12q22 (Lead SNP: rs113174754,  $P = 4.42 \times 10^{-8}$  for

294 VSUM, Model 3) has previously been associated with NDA (rs11836367,  $P = 8.40 \times 10^{-9}$ ,  $r^2 =$   
295 0.59 with rs113174754) [6], overall breast cancer risk (rs113174754,  $P = 1.08 \times 10^{-24}$ ), and ER+  
296 breast cancer risk (rs113174754,  $P = 1.37 \times 10^{-18}$ ) [25]. This locus is also significantly  
297 associated with breast size (rs17356907,  $P = 1.30 \times 10^{-13}$ ,  $r^2 = 0.47$  with rs113174754) [35]. Fig.  
298 2c shows the regional association results for 12q22 from Model 3 (adjusting for age, BMI, DA,  
299 and genetic PCs) for VSUM. The association between V and rs113174754 became non-  
300 significant when we adjusted for NDA. The direction of association with V was consistent across  
301 models and consistent with the association with NDA (opposite direction) and breast cancer risk  
302 (same direction).

303 We identified four additional loci that had previously been associated with MD phenotypes or  
304 breast cancer risk and reached the Bonferroni-corrected thresholds accounting for the number of  
305 MD or breast cancer SNPs tested ( $P < 0.05/72 = 6.94 \times 10^{-4}$  for MD,  $P < 0.05/195 = 2.56 \times 10^{-4}$   
306 for breast cancer risk) in Model 0: 5q23.2 (*PRDM6*), 8p21.2 (*EBF2*), 12p12.1 (*SSPN*), and  
307 16q12.2 (*FTO*) (Table 2). 5q23.2 (Lead SNP: rs335189,  $P = 7.30 \times 10^{-5}$  for VSUM, Model 0) is  
308 a known locus for DA ( $P = 2.84 \times 10^{-11}$ ) and PD ( $P = 5.78 \times 10^{-10}$ ) [8]. The associations with V  
309 were significant in Model 0, Model 1 (adjusting for age, BMI, and genetic PCs), and Model 4  
310 (adjusting for age, BMI, NDA, and genetic PCs) but not with adjustment for DA, PD, or both  
311 (Model 2, 3, and 5). 8p21.2 (Lead SNP: rs13256025,  $P = 5.74 \times 10^{-5}$  for VSUM, Model 0) has  
312 previously been associated with breast cancer risk ( $P = 1.40 \times 10^{-8}$ ) [32]. The associations with  
313 V were significant in Model 0 and 1, and became non-significant when we adjusted for DA,  
314 NDA, or PD (Model 2, 3, 4, and 5). Although this locus has not been reported as a MD locus, the  
315  $P$  value of the association between the lead SNP and PD was close to the genome-wide  
316 significant threshold ( $P = 4.46 \times 10^{-7}$ ) [8]. 12p12.1 (Lead SNP: rs11836164,  $P = 6.69 \times 10^{-5}$  for

317 VSUM, Model 0) is a known locus for DA ( $P = 1.66 \times 10^{-9}$ ) [8]. The associations with V were  
318 significant in Model 0, 1, and 4, and became non-significant when we adjusted for DA, PD, or  
319 both (Model 2, 3, and 5). 16q12.2 (Lead SNP: rs17817449,  $P = 1.12 \times 10^{-6}$  for VSUM, Model 0)  
320 is a known locus for PD ( $P = 5.06 \times 10^{-9}$ ) [8], overall ( $P = 2.52 \times 10^{-21}$ ), ER+ ( $P = 5.59 \times 10^{-14}$ ),  
321 and ER- breast cancer risk ( $P = 1.80 \times 10^{-10}$ ). This locus is also significantly associated with  
322 BMI (rs17817449,  $P = 5.10 \times 10^{-19}$ ) [36] and breast size (rs62033406,  $P = 3.70 \times 10^{-7}$ ,  $r^2 = 0.89$   
323 with rs17817449) [35]. The associations with V were significant in Model 0 and became non-  
324 significant when we adjusted for BMI or any MD phenotype. The directions of association with  
325 V were consistent with those significant associations with MD (same direction for PD and DA,  
326 opposite direction for NDA) or breast cancer (same direction) for all four loci. Association  
327 results of all identified V loci for all models and V assessments can be found in Additional file 1:  
328 Table S4. There was no substantial difference between the results of different V assessments.  
329 The full lookup results of the 72 MD phenotype SNPs and 195 breast cancer SNPs can be found  
330 in Additional file 1: Table S5 and Table S6.

331 We observed significant positive genetic correlations between V and dense area ( $r_g = 0.79$ ,  $P =$   
332  $5.91 \times 10^{-5}$  for VSUM, Model 0) and percent density ( $r_g = 0.73$ ,  $P = 1 \times 10^{-4}$  for VSUM, Model  
333 0) (Fig. 3a). The correlations became non-significant using GWAS results from Model 2  
334 (adjusting for age, BMI, PD, and genetic PCs). Positive correlations were also observed with  
335 overall ( $r_g = 0.20$ ,  $P = 6.90 \times 10^{-3}$  for VSUM, Model 0) and ER+ ( $r_g = 0.22$ ,  $P = 4.60 \times 10^{-3}$  for  
336 VSUM, Model 0) breast cancer and became non-significant when adjusting for PD. We also  
337 observed a significant negative association with adult BMI ( $r_g = -0.36$ ,  $P = 3.88 \times 10^{-7}$  for  
338 VSUM, Model 0), which became non-significant when adjusting for BMI. A strong negative  
339 correlation was observed for NDA ( $r_g = -0.60$ ,  $P = 5.20 \times 10^{-3}$  for VSUM, Model 0) before



340 adjusting for PD. Genetic correlation results were similar across V assessments; the full results  
341 are summarized in Additional file 1: Table S7.

342 In addition to the genetic relationships of V with DA, NDA, PD, and breast cancer risk identified  
343 by genetic correlations, we further identified a significant positive association between V and  
344 ER+ breast cancer ( $z = 3.41$ ,  $P = 6.41 \times 10^{-4}$  for VSUM, Model 0) and a significant negative  
345 association between V and childhood body fatness from the SNP-set test using genome-wide  
346 significant SNPs for childhood body fatness ( $z = -4.91$ ,  $P = 9.05 \times 10^{-7}$  for VSUM, Model 0)  
347 (Fig. 3b). The overall pattern of the associations was similar for genetic correlation and SNP-set  
348 test. It is worth noting that for MD phenotypes and childhood body fatness, the associations with  
349 V remained nominally significant ( $P < 0.05$ ) if we further adjust for BMI and PD in the SNP-set  
350 test. Plots showing Z scores from GWAS of V and GWAS of MD phenotypes [8] and breast  
351 cancer [25] for the SNPs included in the SNP-set tests are present in Fig. 4. SNP-set test results  
352 across all models and V assessments can be found in Additional file 1: Table S8.

353 No substantial change on the top findings was observed after including breast cancer case-  
354 control status as a covariate (Additional file 1: Table S4). There was no multicollinearity issue  
355 for the effect estimates of the genome-wide significant SNPs in Model 5 (VIFs all close to 1).  
356 There were 10 outliers with absolute studentized residual greater than 3 for rs79670367 at  
357 8q24.22 from Model 5 for V65L. The effect estimates for the effect allele increased by 24% after  
358 removing those outliers. No substantial impact of outliers was found for other identified V SNPs.

359

360

## 361 Discussion

362 While MD continues to be one of the most well-established and widely used mammographic risk  
363 factors for breast cancer, there are gaps in our knowledge of mammographic features themselves  
364 and their relationship with breast cancer risk. Current MD measures do not capture the  
365 heterogeneity in the distribution of dense breast tissue on a mammogram, known as texture  
366 variation. Increasing evidence have shown that the performance of texture variation on  
367 discriminating breast cancer outcomes is either comparable or even higher than the performance  
368 of MD measures [12, 16, 37, 38]. Understanding the contributing mechanisms of texture  
369 variation on breast cancer risk, especially the involved genetic components, would expand our  
370 knowledge on breast cancer development. In this study, we performed the first GWAS meta-  
371 analysis of mammographic texture variation, focusing on a summary measure of gray scale  
372 variation on mammograms (V). We identified three genome-wide significant V loci: 6q24.1  
373 (*ECT2L*), 8q24.22 (*LINC01591*), and 12q22 (*PGAMIP5*), the first two of which have not  
374 previously been associated with MD or breast cancer risk. Four additional loci for MD or breast  
375 cancer risk, 5q23.2 (*PRDM6*), 8p21.2 (*EBF2*), 12p12.1 (*SSPN*), and 16q12.2 (*FTO*), were also  
376 found associated with V.

377 Different models of the SNP-V association were fit to capture different effects. Model 0 with  
378 only age and genetic PCs as covariates can capture both the effect of genetic variants on V and  
379 the effect that was mediated by BMI or MD phenotypes. We also fit Model 5 adjusting for all  
380 MD phenotypes together to assess the variant effect that was independent of all adjusted  
381 covariates. Although PD can be calculated from DA and NDA, previous GWAS of MD still  
382 identified different loci and genetic effects for different MD measures. We therefore fit the fully  
383 adjusted Model 5 to minimize the effect of MD phenotypes on the V associations. Collinearity

384 issue in Model 5 did not have an impact on the effect estimates of the variants. Comparing the  
385 results from different models may also provide evidence for the underlying relationships between  
386 the genetic variants, V, and other adjusted covariates as well as boost power to detect V SNPs.  
387 For example, if we observed a SNP-V association in models with and without adjustment for  
388 MD, then it is likely that the SNP influences V through other pathways that are independent of  
389 density; if the SNP-V association was only observed in model without adjusting for density, then  
390 it indicates that the SNP effect on V might be largely mediated by density. Downstream analyses  
391 need to be performed to confirm the relationships. Both V65L and the calculated summary  
392 statistics of the four V assessments, VSUM, were used as our primary outcomes. We have a  
393 larger sample size thus a greater power for low resolution V assessments compared to high  
394 resolution assessments (sample size for V65L and V75L = 7,040; sample size for V65H and  
395 V75H = 4,763). Although a previous study looking at the relationship between V and breast  
396 cancer risk in NHS/NHSII used a different assessment, V75L, as the outcome [16], these two  
397 low resolution V assessments were highly correlated with each other ( $\rho = 0.98$ , Fig. 1) and there  
398 was no substantial difference in the GWAS results of these two assessments (Additional file 1:  
399 Table S4). Using VSUM also has the advantage of boosting power given that the SNP  
400 associations were similar across different V assessments.

401 Among the three genome-wide significant V loci, **12q22** is also associated with NDA and breast  
402 cancer risk in consistent direction, suggesting that at least part of its genetic effect on V is  
403 mediated by NDA or the genetic effect on NDA is mediated by V, and there are potential shared  
404 biological pathways between these three traits. These hypotheses are further supported by the  
405 fact that 12q22 is also associated with total breast size and its association with V was most  
406 significant when adjusting for DA and became non-significant when adjusting for NDA. The

407 lead variant rs113174754 at 12q22 is an indel near pseudogene *PGAMIP5* and is 30kb upstream  
408 of protein coding gene *NTN4* (see Fig. 2c). *NTN4* encodes a member of the netrin family of  
409 proteins, which involved in axon guidance, tumorigenesis, and angiogenesis. NDA SNP at 12q22  
410 (rs11836367-C, correlated with the effect allele of rs113174754) has been found to downregulate  
411 *NTN4* in mammary tissue [6]. *NTN4* has also been identified as a candidate breast cancer risk  
412 gene by colocalization analysis, where the C allele of SNP rs61938093 ( $r^2 = 0.48$  with the effect  
413 allele of rs113174754) at this region reduced *NTN4* promoter activity and knockdown of *NTN4*  
414 promoted breast cell proliferation and tumor growth [39]. These findings suggest a shared  
415 genetic basis and potential biological mechanisms for mammographic risk factors, especially  
416 breast adipose tissue (represented by NDA), and breast cancer risk at this locus, and may also  
417 explain the observed association between V and breast cancer risk. **6q24.1** and **8q24.22** are V  
418 loci that have not been seen associated with MD phenotypes or breast cancer risk. The lead  
419 variant rs138141444 at 6q24.1 is an intronic indel in *ECT2L*. The lead variant rs79670367 at  
420 8q24.22 is an intronic SNP in *LINC01591*. Neither these two genes nor nearby genes have been  
421 associated with breast cancer risk. The genetic effects of these two loci on V are therefore likely  
422 through mechanisms not mediated by MD. It should also be noted that the effect allele frequency  
423 for rs79670367 is less than 5% and the outlier analysis indicated that the association results  
424 might be influenced by influential outliers. Moreover, only about half of the samples have  
425 genotype data on this variant (available in NHS/NHSII Illumina HumanHap and MMHS  
426 OncoArray). Further studies are needed to confirm the findings at these two loci.

427 Four additional V loci have previously been associated with breast cancer risk or MD phenotypes.  
428 The lead variant rs13256025 at **8p21.2** is an intronic SNP in protein coding gene *EBF2*. *EBF2*  
429 encodes well conserved DNA-binding helix-loop-helix transcription factors, which involved in

430 differentiation of osteoblasts. Although little is known about the role of *EBF2* in breast cancer  
431 development, studies have shown that inactivation of *EBF* genes can lead to tumorigenesis via  
432 accumulation and expansion of undifferentiated progenitor cells [40]. **16q12.2** is associated with  
433 both PD and breast cancer risk in the same direction with its lead SNP rs17817449 located in  
434 *FTO*. *FTO* is a well-established susceptibility gene for obesity [41]. In our analysis, the  
435 association was only significant in the base model and became non-significant when adjusting  
436 for BMI, suggesting that its genetic effect on V might be mediated by BMI. *FTO* is  
437 overexpressed in breast cancer cells, which affects the energy metabolism of the cells [42].  
438 **5q23.2** is a known locus for DA and PD. The lead variant rs335189 is an intronic SNP in  
439 *PRDM6*. *PRDM6* encodes a transcriptional repressor involved in the regulation of endothelial  
440 cell proliferation, survival, and differentiation, and may play a role in breast cancer  
441 tumorigenesis [7, 43]. The lead variant rs11836164 at **12p12.1** is an intronic SNP near *SSPN* and  
442 is only associated with DA. Functional analysis needs to be performed to further investigate the  
443 role of identified V SNPs in mammary development and breast cancer etiology.

444 Consistent with the phenotypic relationships we observed for V and MD measures, there were  
445 strong positive genetic correlations of V with DA and PD, and negative genetic correlations with  
446 NDA. The positive genetic correlations between V and breast cancer risk (overall and ER+  
447 specific) were also nominally significant, further supporting that the observed phenotypic  
448 association between V and breast cancer risk can at least be partially explained by shared genetic  
449 components. The magnitude of these genetic correlations is comparable to those between MD  
450 and breast cancer risk [6]. A genetic variant can be associated with multiple traits, which is  
451 known as pleiotropy. Studies have shown that jointly analyzing GWAS data of multiple traits  
452 can boost power to detect genetic associations for each trait and improve the prediction

453 performance [44, 45]. In our analysis, we observed significant genetic correlations of V with MD  
454 phenotypes and BMI using genome-wide association results. It is therefore very likely that a  
455 substantial number of variants are associated with both MD phenotypes, especially NDA, and  
456 BMI, which would dilute the correlations we observed for any pair of the traits. SNP-set tests  
457 may provide more evidence for the shared mechanism underlying two traits using only  
458 susceptibility variants. Here, we found that even if we adjust for PD in the model, there were still  
459 significant correlations between V and PD based on genome-wide significant SNPs for PD,  
460 indicating that the genetic contribution of V cannot be fully explained by PD and PD is either a  
461 mediator or collider of the association between the genetic variants and V (Fig. 4a). Correlations  
462 of V with breast cancer and childhood body fatness were also stronger at the susceptibility  
463 variants. There were still correlations, though not significant, after adjusting for PD, providing  
464 evidence for the genetic relationship between V and these traits that were not mediated by MD  
465 (Fig. 4b).

466 Our study focuses on a summary texture measure, V, but there are also many other texture  
467 features. For example, Manduca et al. systematically evaluated 1,443 textural features and  
468 identified six independently validated strongest features [13]. Malkov et al. identified 15 texture  
469 features that were significantly associated with breast cancer risk, several of which were only  
470 weakly correlated with PD [46]. Studying the genetics of these features or their combinations  
471 may provide additional information for the genetic architecture of breast parenchymal texture  
472 variation. Our study included breast cancer cases, which might be concerning since V has been  
473 associated with breast cancer risk. However, both theoretical [47] and empirical [48] evidence  
474 suggest that including cases of a rare outcome does not bias the association estimates in GWAS  
475 of a secondary outcome, except when both the genetic variant being analyzed and the secondary

476 outcome are very strong risk factors—stronger than those exhibited by breast cancer risk SNPs,  
477 V, or BMI. Indeed, we did not observe any substantial changes on the top findings after further  
478 adjusting for breast cancer case-control status in the model. Moreover, the direction of the  
479 associations we observed—e.g., a breast cancer risk allele was positively associated with V—are  
480 opposite of those expected if the SNP-V association is solely an artefact due to collider bias.  
481 Multiple testing issue caused by studying four V assessments may also be a concern, we  
482 therefore estimated a single summary test statistic, VSUM, to minimize the impact of multiple  
483 testing and to boost power. Studying the computerized automated texture feature can also reduce  
484 the potential bias caused by measurement error that studies on semi-automated MD measures are  
485 usually susceptible to.

486

487

488

489

490

491

492

493

494

## 495 **Conclusions**

496 In conclusion, we performed a GWAS of breast parenchymal texture variation, V, and identified  
497 three independent loci at genome-wide significance, including 12q22 (*PGAMIP5*) that are  
498 associated with MD phenotypes and breast cancer risk, and 6q24.1 (*ECT2L*) and 8q24.22  
499 (*LINC01591*) that are novel V susceptibility loci. Four additional V loci were identified from  
500 looking up MD and breast cancer susceptibility SNPs in GWAS of V, including 5q23.2  
501 (*PRDM6*), 8p21.2 (*EBF2*), 12p12.1 (*SSPN*), and 16q12.2 (*FTO*). These findings provide the first  
502 evidence of the genetic basis of V and shared genetic components between V, MD, and breast  
503 cancer risk. Future studies are needed to confirm our findings and further improve our  
504 understanding of the mechanisms underlying the relationship between texture features, MD, and  
505 breast cancer development.

506

507

508

509

510

511

512

513



514 **List of abbreviations**

515 BCAC: Breast Cancer Association Consortium; BMI: body mass index; DA: dense area; ER:  
516 estrogen receptor; GWAS: genome-wide association study; LD: linkage disequilibrium; MD:  
517 mammographic density; MMHS: Mayo Mammography Health Study; NDA: nondense area;  
518 NHS: Nurses' Health Study; PC: principal component; PD: percent density; SNP: single-  
519 nucleotide polymorphism; VIF: variance inflation factor; V75H: V with 25% erosion and high  
520 resolution; V75L: V with 25% erosion and low resolution; V65H: V with 35% erosion and high  
521 resolution; V65L: V with 35% erosion and low resolution.

522

523

524

525

526

527

528

529

530

531

532 **Declarations**

533 **Ethics approval and consent to participate**

534 The study protocol was approved by the institutional review boards of the Brigham and  
535 Women’s Hospital, Harvard T.H. Chan School of Public Health, and the Mayo Clinic, and was  
536 in accordance with the 1964 Declaration of Helsinki and its later amendments or comparable  
537 ethical standards. All participants provided written informed consent.

538 **Consent for publication**

539 Not applicable

540 **Availability of data and materials**

541 NHS/NHSII: The data that support the findings of this study are available from the Nurses’  
542 Health Studies, however they are not publicly available. Investigators interested in using the data  
543 can request access, and feasibility will be discussed at an investigators’ meeting. Limits are not  
544 placed on scientific questions or methods, and there is no requirement for co-authorship.  
545 Additional data sharing information and policy details can be accessed  
546 at <http://www.nurseshealthstudy.org/researchers>.

547 MMHS: The summary statistics generated from the current study are available from the  
548 corresponding author on reasonable request.

549 **Competing interests**

550 The authors declare that they have no competing interests

551 **Funding**

552 This work is supported by the National Cancer Institute (R01CA175080 and R01CA131332 to  
553 R.M.T., R01CA244670 to S.L., and R03CA224196 to X.J.), Avon Foundation for Women,  
554 Susan G. Komen for the Cure, and Breast Cancer Research Foundation. The Nurses' Health  
555 Study is supported by the National Cancer Institute (UM1CA186107, P01CA87969, and  
556 R01CA49449). The Nurses' Health Study II is supported by the National Cancer Institute  
557 (U01CA176726 and R01CA67262). The Mayo Mammography Health Study is supported by the  
558 National Cancer Institute (R01CA128931 and R01CA97396).

559 **Authors' contributions**

560 XJ, PK, RMT, and CVM conceived and designed the study. RMT and ETW prepared the  
561 mammographic texture variation data for NHS/NHSII. CMV and JH prepared the  
562 mammographic texture variation data for MMHS. CT prepared the genotype data for  
563 NHS/NHSII. SJW prepared the genotype data for MMHS. HC and SL prepared the  
564 mammographic density GWAS data. YL analyzed and interpreted the data, and was a major  
565 contributor in writing the manuscript. All authors read and approved the final manuscript.

566 **Acknowledgements**

567 We would like to thank the participants and staff of the NHS and NHSII for their valuable  
568 contributions as well as the following state cancer registries for their help: AL, AZ, AR, CA, CO,  
569 CT, DE, FL, GA, ID, IL, IN, IA, KY, LA, ME, MD, MA, MI, NE, NH, NJ, NY, NC, ND, OH,  
570 OK, OR, PA, RI, SC, TN, TX, VA, WA, WY.

571 The BCAC MD GWAS was supported by CA244670 and CA194393. BCAC is funded by the  
572 European Union's Horizon 2020 Research and Innovation Programme (grant numbers 634935  
573 and 633784 for BRIDGES and B-CAST respectively), and the PERSPECTIVE I&I project,  
574 funded by the Government of Canada through Genome Canada and the Canadian Institutes of  
575 Health Research, the Ministère de l'Économie et de l'Innovation du Québec through Genome  
576 Québec, the Quebec Breast Cancer Foundation. The EU Horizon 2020 Research and Innovation  
577 Programme funding source had no role in study design, data collection, data analysis, data  
578 interpretation or writing of the report. Additional funding for BCAC is provided via the  
579 Confluence project which is funded with intramural funds from the National Cancer Institute  
580 Intramural Research Program, National Institutes of Health.

581 Genotyping of the OncoArray was funded by the NIH Grant U19 CA148065, and Cancer UK  
582 Grant C1287/A16563 and the PERSPECTIVE project supported by the Government of Canada  
583 through Genome Canada and the Canadian Institutes of Health Research (grant GPH-129344)  
584 and, the Ministère de l'Économie, Science et Innovation du Québec through Genome Québec  
585 and the PSRSIIRI-701 grant, and the Quebec Breast Cancer Foundation. Funding for iCOGS  
586 came from: the European Community's Seventh Framework Programme under grant agreement  
587 n° 223175 (HEALTH-F2-2009-223175) (COGS), Cancer Research UK (C1287/A10118,  
588 C1287/A10710, C12292/A11174, C1281/A12014, C5047/A8384, C5047/A15007,  
589 C5047/A10692, C8197/A16565), the National Institutes of Health (CA128978) and Post-Cancer  
590 GWAS initiative (1U19 CA148537, 1U19 CA148065 and 1U19 CA148112 - the GAME-ON  
591 initiative), the Department of Defence (W81XWH-10-1-0341), the Canadian Institutes of Health  
592 Research (CIHR) for the CIHR Team in Familial Risks of Breast Cancer, and Komen

593 Foundation for the Cure, the Breast Cancer Research Foundation, and the Ovarian Cancer

594 Research Fund.

595

## 596 References

- 597 1. Byrne C, Schairer C, Wolfe J, Parekh N, Salane M, Brinton LA, Hoover R, Haile R:  
598 **Mammographic features and breast cancer risk: effects with time, age, and**  
599 **menopause status.** *J Natl Cancer Inst* 1995, **87**(21):1622-1629.
- 600 2. Boyd NF, Martin LJ, Yaffe MJ, Minkin S: **Mammographic density and breast cancer risk:**  
601 **current understanding and future prospects.** *Breast Cancer Res* 2011, **13**(6):223.
- 602 3. Boyd NF, Guo H, Martin LJ, Sun L, Stone J, Fishell E, Jong RA, Hislop G, Chiarelli A, Minkin  
603 S *et al*: **Mammographic density and the risk and detection of breast cancer.** *N Engl J*  
604 *Med* 2007, **356**(3):227-236.
- 605 4. Boyd NF, Dite GS, Stone J, Gunasekara A, English DR, McCredie MR, Giles GG, Trichler D,  
606 Chiarelli A, Yaffe MJ *et al*: **Heritability of mammographic density, a risk factor for**  
607 **breast cancer.** *N Engl J Med* 2002, **347**(12):886-894.
- 608 5. Stone J, Dite GS, Gunasekara A, English DR, McCredie MR, Giles GG, Cawson JN, Hegele  
609 RA, Chiarelli AM, Yaffe MJ *et al*: **The heritability of mammographically dense and**  
610 **nondense breast tissue.** *Cancer Epidemiol Biomarkers Prev* 2006, **15**(4):612-617.
- 611 6. Sieh W, Rothstein JH, Klein RJ, Alexeeff SE, Sakoda LC, Jorgenson E, McBride RB, Graff RE,  
612 McGuire V, Achacoso N *et al*: **Identification of 31 loci for mammographic density**  
613 **phenotypes and their associations with breast cancer risk.** *Nat Commun* 2020,  
614 **11**(1):5116.
- 615 7. Lindstrom S, Thompson DJ, Paterson AD, Li J, Gierach GL, Scott C, Stone J, Douglas JA,  
616 dos-Santos-Silva I, Fernandez-Navarro P *et al*: **Genome-wide association study**  
617 **identifies multiple loci associated with both mammographic density and breast cancer**  
618 **risk.** *Nat Commun* 2014, **5**:5303.
- 619 8. Chen H, Fan S, Stone J, Thompson DJ, Douglas J, Li S, Scott C, Bolla MK, Wang Q, Dennis J  
620 *et al*: **Genome-wide and transcriptome-wide association studies of mammographic**  
621 **density phenotypes reveal novel loci.** *Breast Cancer Res* 2022, **24**(1):27.
- 622 9. Boyd NF, Rommens JM, Vogt K, Lee V, Hopper JL, Yaffe MJ, Paterson AD:  
623 **Mammographic breast density as an intermediate phenotype for breast cancer.** *Lancet*  
624 *Oncol* 2005, **6**(10):798-808.
- 625 10. Byng JW, Boyd NF, Fishell E, Jong RA, Yaffe MJ: **The quantitative analysis of**  
626 **mammographic densities.** *Phys Med Biol* 1994, **39**(10):1629-1638.
- 627 11. Gastouniotti A, Conant EF, Kontos D: **Beyond breast density: a review on the advancing**  
628 **role of parenchymal texture analysis in breast cancer risk assessment.** *Breast Cancer*  
629 *Res* 2016, **18**(1):91.
- 630 12. Heine JJ, Scott CG, Sellers TA, Brandt KR, Serie DJ, Wu FF, Morton MJ, Schueler BA,  
631 Couch FJ, Olson JE *et al*: **A novel automated mammographic density measure and**  
632 **breast cancer risk.** *J Natl Cancer Inst* 2012, **104**(13):1028-1037.
- 633 13. Manduca A, Carston MJ, Heine JJ, Scott CG, Pankratz VS, Brandt KR, Sellers TA, Vachon  
634 CM, Cerhan JR: **Texture features from mammographic images and risk of breast cancer.**  
635 *Cancer Epidemiol Biomarkers Prev* 2009, **18**(3):837-845.
- 636 14. Nielsen M, Karemore G, Loog M, Raundahl J, Karssemeijer N, Otten JD, Karsdal MA,  
637 Vachon CM, Christiansen C: **A novel and automatic mammographic texture**

- 638 **resemblance marker is an independent risk factor for breast cancer.** *Cancer Epidemiol*  
639 2011, **35**(4):381-387.
- 640 15. Wanders JOP, van Gils CH, Karssemeijer N, Holland K, Kallenberg M, Peeters PHM,  
641 Nielsen M, Lillholm M: **The combined effect of mammographic texture and density on**  
642 **breast cancer risk: a cohort study.** *Breast Cancer Res* 2018, **20**(1):36.
- 643 16. Warner ET, Rice MS, Zeleznik OA, Fowler EE, Murthy D, Vachon CM, Bertrand KA, Rosner  
644 BA, Heine J, Tamimi RM: **Automated percent mammographic density, mammographic**  
645 **texture variation, and risk of breast cancer: a nested case-control study.** *NPJ Breast*  
646 *Cancer* 2021, **7**(1):68.
- 647 17. Oh H, Rice MS, Warner ET, Bertrand KA, Fowler EE, Eliassen AH, Rosner BA, Heine JJ,  
648 Tamimi RM: **Early-Life and Adult Anthropometrics in Relation to Mammographic Image**  
649 **Intensity Variation in the Nurses' Health Studies.** *Cancer Epidemiol Biomarkers Prev*  
650 2020, **29**(2):343-351.
- 651 18. Tworoger SS, Missmer SA, Eliassen AH, Spiegelman D, Folkert E, Dowsett M, Barbieri RL,  
652 Hankinson SE: **The association of plasma DHEA and DHEA sulfate with breast cancer**  
653 **risk in predominantly premenopausal women.** *Cancer Epidemiol Biomarkers Prev* 2006,  
654 **15**(5):967-971.
- 655 19. Olson JE, Sellers TA, Scott CG, Schueler BA, Brandt KR, Serie DJ, Jensen MR, Wu FF,  
656 Morton MJ, Heine JJ *et al*: **The influence of mammogram acquisition on the**  
657 **mammographic density and breast cancer association in the Mayo Mammography**  
658 **Health Study cohort.** *Breast Cancer Res* 2012, **14**(6):R147.
- 659 20. Heine JJ, Cao K, Rollison DE: **Calibrated measures for breast density estimation.** *Acad*  
660 *Radiol* 2011, **18**(5):547-555.
- 661 21. Heine JJ, Cao K, Rollison DE, Tiffenberg G, Thomas JA: **A quantitative description of the**  
662 **percentage of breast density measurement using full-field digital mammography.** *Acad*  
663 *Radiol* 2011, **18**(5):556-564.
- 664 22. Boyd NF, Stone J, Martin LJ, Jong R, Fishell E, Yaffe M, Hammond G, Minkin S: **The**  
665 **association of breast mitogens with mammographic densities.** *Br J Cancer* 2002,  
666 **87**(8):876-882.
- 667 23. Yaghjian L, Pettersson A, Colditz GA, Collins LC, Schnitt SJ, Beck AH, Rosner B, Vachon C,  
668 Tamimi RM: **Postmenopausal mammographic breast density and subsequent breast**  
669 **cancer risk according to selected tissue markers.** *Br J Cancer* 2015, **113**(7):1104-1113.
- 670 24. Lindstrom S, Loomis S, Turman C, Huang H, Huang J, Aschard H, Chan AT, Choi H,  
671 Cornelis M, Curhan G *et al*: **A comprehensive survey of genetic variation in 20,691**  
672 **subjects from four large cohorts.** *PLoS One* 2017, **12**(3):e0173997.
- 673 25. Michailidou K, Lindstrom S, Dennis J, Beesley J, Hui S, Kar S, Lemacon A, Soucy P, Glubb  
674 D, Rostamianfar A *et al*: **Association analysis identifies 65 new breast cancer risk loci.**  
675 *Nature* 2017, **551**(7678):92-94.
- 676 26. Sudmant PH, Rausch T, Gardner EJ, Handsaker RE, Abyzov A, Huddleston J, Zhang Y, Ye K,  
677 Jun G, Fritz MH *et al*: **An integrated map of structural variation in 2,504 human**  
678 **genomes.** *Nature* 2015, **526**(7571):75-81.
- 679 27. Zhan X, Hu Y, Li B, Abecasis GR, Liu DJ: **RVTESTS: an efficient and comprehensive tool**  
680 **for rare variant association analysis using sequence data.** *Bioinformatics* 2016,  
681 **32**(9):1423-1426.

- 682 28. Chang CC, Chow CC, Tellier LC, Vattikuti S, Purcell SM, Lee JJ: **Second-generation PLINK:**  
683 **rising to the challenge of larger and richer datasets.** *Gigascience* 2015, **4**:7.
- 684 29. Willer CJ, Li Y, Abecasis GR: **METAL: fast and efficient meta-analysis of genomewide**  
685 **association scans.** *Bioinformatics* 2010, **26**(17):2190-2191.
- 686 30. Boughton AP, Welch RP, Flickinger M, VandeHaar P, Taliun D, Abecasis GR, Boehnke M:  
687 **LocusZoom.js: Interactive and embeddable visualization of genetic association study**  
688 **results.** *Bioinformatics* 2021.
- 689 31. Liu Z, Lin X: **A Geometric Perspective on the Power of Principal Component Association**  
690 **Tests in Multiple Phenotype Studies.** *J Am Stat Assoc* 2019, **114**(527):975-990.
- 691 32. Zhang H, Ahearn TU, Lecarpentier J, Barnes D, Beesley J, Qi G, Jiang X, O'Mara TA, Zhao  
692 N, Bolla MK *et al*: **Genome-wide association study identifies 32 novel breast cancer**  
693 **susceptibility loci from overall and subtype-specific analyses.** *Nat Genet* 2020,  
694 **52**(6):572-581.
- 695 33. Bulik-Sullivan B, Finucane HK, Anttila V, Gusev A, Day FR, Loh PR, ReproGen C,  
696 Psychiatric Genomics C, Genetic Consortium for Anorexia Nervosa of the Wellcome  
697 Trust Case Control C, Duncan L *et al*: **An atlas of genetic correlations across human**  
698 **diseases and traits.** *Nat Genet* 2015, **47**(11):1236-1241.
- 699 34. Bulik-Sullivan BK, Loh PR, Finucane HK, Ripke S, Yang J, Schizophrenia Working Group of  
700 the Psychiatric Genomics C, Patterson N, Daly MJ, Price AL, Neale BM: **LD Score**  
701 **regression distinguishes confounding from polygenicity in genome-wide association**  
702 **studies.** *Nat Genet* 2015, **47**(3):291-295.
- 703 35. Pickrell JK, Berisa T, Liu JZ, Segurel L, Tung JY, Hinds DA: **Detection and interpretation of**  
704 **shared genetic influences on 42 human traits.** *Nat Genet* 2016, **48**(7):709-717.
- 705 36. Wojcik GL, Graff M, Nishimura KK, Tao R, Haessler J, Gignoux CR, Highland HM, Patel YM,  
706 Sorokin EP, Avery CL *et al*: **Genetic analyses of diverse populations improves discovery**  
707 **for complex traits.** *Nature* 2019, **570**(7762):514-518.
- 708 37. Gierach GL, Li H, Loud JT, Greene MH, Chow CK, Lan L, Prindiville SA, Eng-Wong J,  
709 Soballe PW, Giambartolomei C *et al*: **Relationships between computer-extracted**  
710 **mammographic texture pattern features and BRCA1/2 mutation status: a cross-**  
711 **sectional study.** *Breast Cancer Res* 2014, **16**(4):424.
- 712 38. Li H, Giger ML, Olopade OI, Margolis A, Lan L, Chinander MR: **Computerized texture**  
713 **analysis of mammographic parenchymal patterns of digitized mammograms.** *Acad*  
714 *Radiol* 2005, **12**(7):863-873.
- 715 39. Beesley J, Sivakumaran H, Moradi Marjaneh M, Shi W, Hillman KM, Kaufmann S, Hussein  
716 N, Kar S, Lima LG, Ham S *et al*: **eQTL Colocalization Analyses Identify NTN4 as a**  
717 **Candidate Breast Cancer Risk Gene.** *Am J Hum Genet* 2020, **107**(4):778-787.
- 718 40. Liao D: **Emerging roles of the EBF family of transcription factors in tumor suppression.**  
719 *Mol Cancer Res* 2009, **7**(12):1893-1901.
- 720 41. Loos RJ, Yeo GS: **The bigger picture of FTO: the first GWAS-identified obesity gene.** *Nat*  
721 *Rev Endocrinol* 2014, **10**(1):51-61.
- 722 42. Liu Y, Wang R, Zhang L, Li J, Lou K, Shi B: **The lipid metabolism gene FTO influences**  
723 **breast cancer cell energy metabolism via the PI3K/AKT signaling pathway.** *Oncol Lett*  
724 2017, **13**(6):4685-4690.



- 725 43. Casamassimi A, Rienzo M, Di Zazzo E, Sorrentino A, Fiore D, Proto MC, Moncharmont B,  
726 Gazerro P, Bifulco M, Abbondanza C: **Multifaceted Role of PRDM Proteins in Human**  
727 **Cancer**. *Int J Mol Sci* 2020, **21**(7).
- 728 44. Aguirre M, Tanigawa Y, Venkataraman GR, Tibshirani R, Hastie T, Rivas MA: **Polygenic**  
729 **risk modeling with latent trait-related genetic components**. *Eur J Hum Genet* 2021,  
730 **29**(7):1071-1081.
- 731 45. Turley P, Walters RK, Maghziyan O, Okbay A, Lee JJ, Fontana MA, Nguyen-Viet TA,  
732 Wedow R, Zacher M, Furlotte NA *et al*: **Multi-trait analysis of genome-wide association**  
733 **summary statistics using MTAG**. *Nat Genet* 2018, **50**(2):229-237.
- 734 46. Malkov S, Shepherd JA, Scott CG, Tamimi RM, Ma L, Bertrand KA, Couch F, Jensen MR,  
735 Mahmoudzadeh AP, Fan B *et al*: **Mammographic texture and risk of breast cancer by**  
736 **tumor type and estrogen receptor status**. *Breast Cancer Res* 2016, **18**(1):122.
- 737 47. Monsees GM, Tamimi RM, Kraft P: **Genome-wide association scans for secondary traits**  
738 **using case-control samples**. *Genet Epidemiol* 2009, **33**(8):717-728.
- 739 48. Lindstrom S, Vachon CM, Li J, Varghese J, Thompson D, Warren R, Brown J, Leyland J,  
740 Audley T, Wareham NJ *et al*: **Common variants in ZNF365 are associated with both**  
741 **mammographic density and breast cancer risk**. *Nat Genet* 2011, **43**(3):185-187.  
742  
743  
744  
745  
746  
747  
748  
749  
750  
751  
752  
753  
754  
755  
756  
757  
758  
759  
760  
761  
762  
763  
764  
765  
766  
767  
768

## Tables

**Table 1** Characteristics of NHS/NHSII and MMHS study population

|                               | <b>NHS/NHSII (n = 4831)</b> | <b>MMHS (n = 2209)</b> |
|-------------------------------|-----------------------------|------------------------|
|                               | Mean (SD)                   | Mean (SD)              |
| <b>Age (years)</b>            | 53.8 (9.2)                  | 58.9 (11.9)            |
| <b>BMI (kg/m<sup>2</sup>)</b> | 25.9 (5.3)                  | 28.0 (6.2)             |
| <b>Dense area</b>             | 43.4 (29.3)                 | 23.8 (17.0)            |
| <b>Nondense area</b>          | 109.3 (73.7)                | 130 (67.1)             |
| <b>Percent density</b>        | 32.8 (19.7)                 | 17.9 (12.9)            |

*Abbreviations: NHS* Nurses' Health Study, *MMHS* Mayo Mammography Health Study, *SD* standard deviation, *BMI* body mass index

**Table 2** Novel V loci and their associations with mammographic density phenotypes and breast cancer risk, overall and stratified by estrogen receptor status

| Region                                           | Lead SNP      | Position  | Gene <sup>a</sup> | EA/OA       | EAF  | V65L  |              |              | VSUM     |         |          | MD phenotypes <sup>b</sup> |         |          | Breast cancer risk <sup>b</sup> |              |             |          |
|--------------------------------------------------|---------------|-----------|-------------------|-------------|------|-------|--------------|--------------|----------|---------|----------|----------------------------|---------|----------|---------------------------------|--------------|-------------|----------|
|                                                  |               |           |                   |             |      | Model | β (SE)       | P value      | Model    | Z score | P value  | Phenotype                  | Z score | P value  | Phenotype                       | β (SE)       | P value     |          |
| <i>Genome-wide significant loci<sup>c</sup></i>  |               |           |                   |             |      |       |              |              |          |         |          |                            |         |          |                                 |              |             |          |
| <b>6q24.1<sup>d</sup></b>                        | rs138141444   | 139157426 | ECT2L             | CT/C        | 0.58 | 0     | -0.08 (0.02) | 1.02E-05     | 0        | -5.32   | 1.04E-07 | DA                         | -0.31   | 7.55E-01 | Overall                         | 0.00 (0.01)  | 8.09E-01    |          |
|                                                  |               |           |                   |             |      | 1     | -0.07 (0.02) | 3.06E-05     | 1        | -5.06   | 4.10E-07 | NDA                        | -0.01   | 9.90E-01 | ER+                             | 0.00 (0.01)  | 9.29E-01    |          |
|                                                  |               |           |                   |             |      | 2     | -0.06 (0.01) | 6.43E-05     | 2        | -4.99   | 6.00E-07 | PD                         | -0.12   | 9.05E-01 | ER-                             | 0.02 (0.01)  | 2.32E-01    |          |
|                                                  |               |           |                   |             |      | 3     | -0.06 (0.01) | 2.28E-04     | 3        | -4.62   | 3.87E-06 |                            |         |          |                                 |              |             |          |
|                                                  |               |           |                   |             |      | 4     | -0.06 (0.02) | 1.14E-04     | 4        | -4.96   | 7.12E-07 |                            |         |          |                                 |              |             |          |
| <b>8q24.22</b>                                   | rs79670367    | 136280666 | LINC01591         | A/C         | 0.02 | 5     | -0.05 (0.01) | 1.95E-04     | 5        | -4.69   | 2.78E-06 |                            |         |          |                                 |              |             |          |
|                                                  |               |           |                   |             |      | 0     | -0.34 (0.14) | 1.71E-02     | 0        | -2.55   | 1.09E-02 | DA                         | 0.13    | 8.99E-01 | Overall                         | -0.08 (0.03) | 1.92E-02    |          |
|                                                  |               |           |                   |             |      | 1     | -0.41 (0.14) | 2.75E-03     | 1        | -3.08   | 2.05E-03 | NDA                        | 0.45    | 6.57E-01 | ER+                             | -0.08 (0.04) | 3.58E-02    |          |
|                                                  |               |           |                   |             |      | 2     | -0.57 (0.11) | 4.63E-07     | 2        | -5.34   | 9.32E-08 | PD                         | -0.64   | 5.25E-01 | ER-                             | -0.10 (0.06) | 1.25E-01    |          |
|                                                  |               |           |                   |             |      | 3     | -0.55 (0.12) | 2.41E-06     | 3        | -5.07   | 3.97E-07 |                            |         |          |                                 |              |             |          |
| <b>12q22</b>                                     | rs113174754   | 96021847  | PGAMIP5           | A/ACCTGTAGT | 0.57 | 5     | -0.39 (0.13) | 2.23E-03     | 4        | -3.30   | 9.72E-04 |                            |         |          |                                 |              |             |          |
|                                                  |               |           |                   |             |      | 0     | 0.07 (0.02)  | 1.25E-04     | 0        | 4.53    | 5.91E-06 | DA                         | -2.34   | 1.95E-02 | Overall                         | 0.07 (0.01)  | 1.08E-24    |          |
|                                                  |               |           |                   |             |      | 1     | 0.07 (0.02)  | 8.74E-05     | 1        | 4.61    | 4.05E-06 | NDA                        | -3.97   | 7.26E-05 | ER+                             | 0.07 (0.01)  | 1.37E-18    |          |
|                                                  |               |           |                   |             |      | 2     | 0.06 (0.02)  | 3.39E-05     | 2        | 4.62    | 3.82E-06 | PD                         | 0.81    | 4.17E-01 | ER-                             | 0.06 (0.01)  | 3.44E-06    |          |
|                                                  |               |           |                   |             |      | 3     | 0.08 (0.02)  | 3.40E-07     | 3        | 5.47    | 4.42E-08 |                            |         |          |                                 |              |             |          |
| <i>MD or breast cancer risk loci<sup>c</sup></i> | <b>5q23.2</b> | rs335189  | 122446856         | PRDM6       | C/G  | 0.70  | 5            | -0.56 (0.11) | 3.61E-07 | 5       | -5.58    | 2.38E-08                   |         |          |                                 |              |             |          |
|                                                  |               |           |                   |             |      |       | 0            | 0.07 (0.02)  | 1.25E-04 | 0       | 4.53     | 5.91E-06                   | DA      | -2.34    | 1.95E-02                        | Overall      | 0.07 (0.01) | 1.08E-24 |
|                                                  |               |           |                   |             |      |       | 1            | 0.07 (0.02)  | 8.74E-05 | 1       | 4.61     | 4.05E-06                   | NDA     | -3.97    | 7.26E-05                        | ER+          | 0.07 (0.01) | 1.37E-18 |
|                                                  |               |           |                   |             |      |       | 2            | 0.06 (0.02)  | 3.39E-05 | 2       | 4.62     | 3.82E-06                   | PD      | 0.81     | 4.17E-01                        | ER-          | 0.06 (0.01) | 3.44E-06 |
|                                                  |               |           |                   |             |      |       | 3            | 0.08 (0.02)  | 3.40E-07 | 3       | 5.47     | 4.42E-08                   |         |          |                                 |              |             |          |
| <b>5q23.2</b>                                    | rs335189      | 122446856 | PRDM6             | C/G         | 0.70 | 0     | -0.07 (0.02) | 2.15E-04     | 0        | -3.97   | 7.30E-05 | DA                         | -6.66   | 2.84E-11 | Overall                         | -0.03 (0.01) | 9.55E-05    |          |
|                                                  |               |           |                   |             |      | 1     | -0.06 (0.02) | 2.67E-04     | 1        | -3.84   | 1.24E-04 | NDA                        | 2.60    | 9.39E-03 | ER+                             | -0.03 (0.01) | 1.54E-03    |          |
|                                                  |               |           |                   |             |      | 2     | -0.03 (0.01) | 6.26E-02     | 2        | -2.26   | 2.35E-02 | PD                         | -6.20   | 5.78E-10 | ER-                             | -0.01 (0.01) | 3.25E-01    |          |
|                                                  |               |           |                   |             |      | 3     | -0.04 (0.02) | 6.42E-03     | 3        | -3.13   | 1.73E-03 |                            |         |          |                                 |              |             |          |
|                                                  |               |           |                   |             |      | 4     | -0.06 (0.02) | 4.65E-04     | 4        | -3.51   | 4.50E-04 |                            |         |          |                                 |              |             |          |
| <b>8p21.2</b>                                    | rs13256025    | 25831778  | EBF2              | T/C         | 0.20 | 5     | -0.03 (0.01) | 2.61E-02     | 5        | -2.58   | 9.85E-03 |                            |         |          |                                 |              |             |          |
|                                                  |               |           |                   |             |      | 0     | 0.09 (0.02)  | 6.23E-05     | 0        | 4.02    | 5.74E-05 | DA                         | 3.32    | 9.17E-04 | Overall                         | 0.04 (0.01)  | 2.12E-07    |          |
|                                                  |               |           |                   |             |      | 1     | 0.08 (0.02)  | 7.58E-05     | 1        | 3.94    | 8.01E-05 | NDA                        | -4.26   | 2.01E-05 | ER+                             | 0.03 (0.01)  | 8.77E-04    |          |
|                                                  |               |           |                   |             |      | 2     | 0.04 (0.02)  | 1.69E-02     | 2        | 2.54    | 1.11E-02 | PD                         | 5.05    | 4.46E-07 | ER-                             | 0.06 (0.01)  | 1.78E-04    |          |
|                                                  |               |           |                   |             |      | 3     | 0.05 (0.02)  | 5.86E-03     | 3        | 2.92    | 3.47E-03 |                            |         |          |                                 |              |             |          |
| <b>12p12.1</b>                                   | rs11836164    | 26446625  | SSPN              | T/C         | 0.76 | 4     | 0.06 (0.02)  | 1.39E-03     | 4        | 3.23    | 1.22E-03 |                            |         |          |                                 |              |             |          |
|                                                  |               |           |                   |             |      | 5     | 0.04 (0.02)  | 3.31E-02     | 5        | 2.37    | 1.79E-02 |                            |         |          |                                 |              |             |          |
|                                                  |               |           |                   |             |      | 0     | -0.09 (0.02) | 8.22E-06     | 0        | -3.99   | 6.69E-05 | DA                         | -6.03   | 1.66E-09 | Overall                         | 0.01 (0.01)  | 6.95E-02    |          |
|                                                  |               |           |                   |             |      | 1     | -0.08 (0.02) | 7.20E-06     | 1        | -4.05   | 5.19E-05 | NDA                        | -0.73   | 4.67E-01 | ER+                             | 0.00 (0.01)  | 7.35E-01    |          |
|                                                  |               |           |                   |             |      | 2     | -0.04 (0.02) | 7.39E-03     | 2        | -2.37   | 1.77E-02 | PD                         | -5.43   | 5.55E-08 | ER-                             | 0.03 (0.01)  | 5.72E-02    |          |
| <b>16q12.2</b>                                   | rs17817449    | 53813367  | FTO               | T/G         | 0.61 | 3     | -0.05 (0.02) | 3.18E-03     | 3        | -2.55   | 1.09E-02 |                            |         |          |                                 |              |             |          |
|                                                  |               |           |                   |             |      | 4     | -0.08 (0.02) | 1.14E-05     | 4        | -4.17   | 3.03E-05 |                            |         |          |                                 |              |             |          |
|                                                  |               |           |                   |             |      | 5     | -0.04 (0.02) | 6.93E-03     | 5        | -2.47   | 1.34E-02 |                            |         |          |                                 |              |             |          |
|                                                  |               |           |                   |             |      | 0     | 0.09 (0.02)  | 1.63E-07     | 0        | 4.87    | 1.12E-06 | DA                         | 4.64    | 3.49E-06 | Overall                         | 0.06 (0.01)  | 2.52E-21    |          |
|                                                  |               |           |                   |             |      | 1     | 0.06 (0.02)  | 2.46E-04     | 1        | 3.32    | 8.93E-04 | NDA                        | -3.10   | 1.94E-03 | ER+                             | 0.06 (0.01)  | 5.59E-14    |          |
| <b>16q12.2</b>                                   | rs17817449    | 53813367  | FTO               | T/G         | 0.61 | 2     | 0.04 (0.01)  | 1.50E-03     | 2        | 2.85    | 4.36E-03 | PD                         | 5.85    | 5.06E-09 | ER-                             | 0.07 (0.01)  | 1.80E-10    |          |
|                                                  |               |           |                   |             |      | 3     | 0.05 (0.01)  | 1.51E-04     | 3        | 3.35    | 8.20E-04 |                            |         |          |                                 |              |             |          |
|                                                  |               |           |                   |             |      | 4     | 0.05 (0.02)  | 2.42E-03     | 4        | 2.77    | 5.66E-03 |                            |         |          |                                 |              |             |          |
|                                                  |               |           |                   |             |      | 5     | 0.04 (0.01)  | 1.46E-03     | 5        | 2.80    | 5.14E-03 |                            |         |          |                                 |              |             |          |

<sup>a</sup>Nearest gene within 500kb of the lead SNP

<sup>b</sup>Summary statistics were from Breast Cancer Association Consortium [8, 25]

<sup>c</sup>Genome-wide significant loci ( $P < 5 \times 10^{-8}$ ) in any model for any V assessment

<sup>d</sup>6q24.1 (rs138141444) is genome-wide significant for V75L (Additional file 1: Table S4)

<sup>e</sup>Significant V loci at the Bonferroni-corrected threshold of  $P < 6.94 \times 10^{-4}$  accounting for the 72 MD phenotype SNPs tested or  $P < 2.56 \times 10^{-4}$  accounting for the 195 breast cancer SNPs tested based on Model 0.

*Abbreviations:* *SNP* single-nucleotide polymorphism, *EA* effect allele, *OA* other allele, *EAF* effect allele frequency, *MD* mammographic density, *DA* dense area, *NDA* nondense area, *PD* percent density, *ER* estrogen receptor

## Figures

**Fig. 1** Scatter plots of four V assessments and V65L by three mammographic density phenotypes. **a** = scatter plots of four V assessments; **b** = scatter plots of V65L by dense area (DA), nondense area (NDA), and percent density (PD). Spearman correlation between the two measures is shown on the upper left or right corner of each plot. Red lines on the plots are the diagonal lines.

**Fig. 2** Regional association plots for the three genome-wide significant V loci. **a** = 6q24.1 (rs138141444; V75H, Model 0); **b** = 8q24.22 (rs79670367; VSUM, Model 5); **c** = 12q22 (rs113174754; VSUM, Model 3). Model and V assessment with the most significant results for each locus are shown. Each plot is centered around the lead SNP of each locus. SNPs in the 95% credible set at each locus are shown in color. Physical positions are based on NCBI Genome Reference Consortium Human Build 37. Plots were generated using LocusZoom [30].

*Abbreviations: SNP* single-nucleotide polymorphism

**Fig. 3** Genetic correlation and SNP-set test results of V with mammographic density phenotypes, breast cancer risk, and other breast cancer risk factors. **a** = genetic correlations between V and other traits; **b** = SNP-set test results of the relationship of V and other traits. Results of Model 0 and 2 for V65L and VSUM are shown. Estimates passed the Bonferroni threshold ( $P < 0.05/40 = 1.25 \times 10^{-3}$ ) are marked with triple asterisk (\*\*\*) ; estimates with  $P < 0.01$  are marked with double asterisk (\*\*); estimates with nominal significance ( $P < 0.05$ ) are marked with single asterisk (\*). Genetic correlations between VSUM (Model 2) and MD phenotypes were not estimated due to the out of bounds heritability of V.

*Abbreviations: SNP* single-nucleotide polymorphism, *DA* dense area, *NDA* nondense area, *PD* percent density, *ER* estrogen receptor, *BMI* body mass index

**Fig. 4** Z scores from GWAS of V, mammographic density phenotypes, and breast cancer risk for SNPs included in SNP-set test. **a** = scatter plots of Z scores from GWAS of V by Z scores from GWAS of percent density (PD), dense area (DA), and nondense area (NDA) for mammographic density SNPs; **b** = scatter plots of Z scores from GWAS of V by Z scores from GWAS of overall breast cancer risk and stratified by estrogen receptor (ER) status for breast cancer SNPs. For each

SNP, GWAS results from Model 0 and 2 for VSUM are shown with gray and red dots, respectively. RS number for some SNPs are not shown on the plots. Gray line is the fitted linear regression line of Z scores for results from Model 0; red line is the fitted linear regression line of Z scores for results from Model 2. Note that some of the overall breast cancer risk SNPs are not genome-wide significant because we obtained the Z scores from one study and those SNPs were reported by other studies.

*Abbreviations:* GWAS genome-wide association study, SNP single-nucleotide polymorphism

## **Additional files**

### **Additional file 1 (XLSX):**

**Table S1.** Number of GWAS subjects by study and platform.

**Table S4.** GWAS results of significant V loci for all V assessments and models.

**Table S5.** Lookup results of 72 MD phenotype SNPs in GWAS of V.

**Table S6.** Lookup results of 195 breast cancer SNPs in GWAS of V.

**Table S7.** Genetic correlation results of all V assessments and models.

**Table S8.** SNP-set test results of all V assessments and models.

### **Additional file 2 (DOCX):**

**Table S2.** Sources of summary statistics of breast cancer risk and breast cancer risk factors for calculating genetic correlation.

**Table S3.** Sources of summary statistics of breast cancer risk and breast cancer risk factors for the SNP-set test.

**Figure S1.** Quantile-quantile plots of the GWAS meta-analysis results.

**Figure S2.** Manhattan plots of the GWAS meta-analysis results.

**Figure S3.** Quantile-quantile plots of the *P* value of heterogeneity.

# Fig. 1

## a

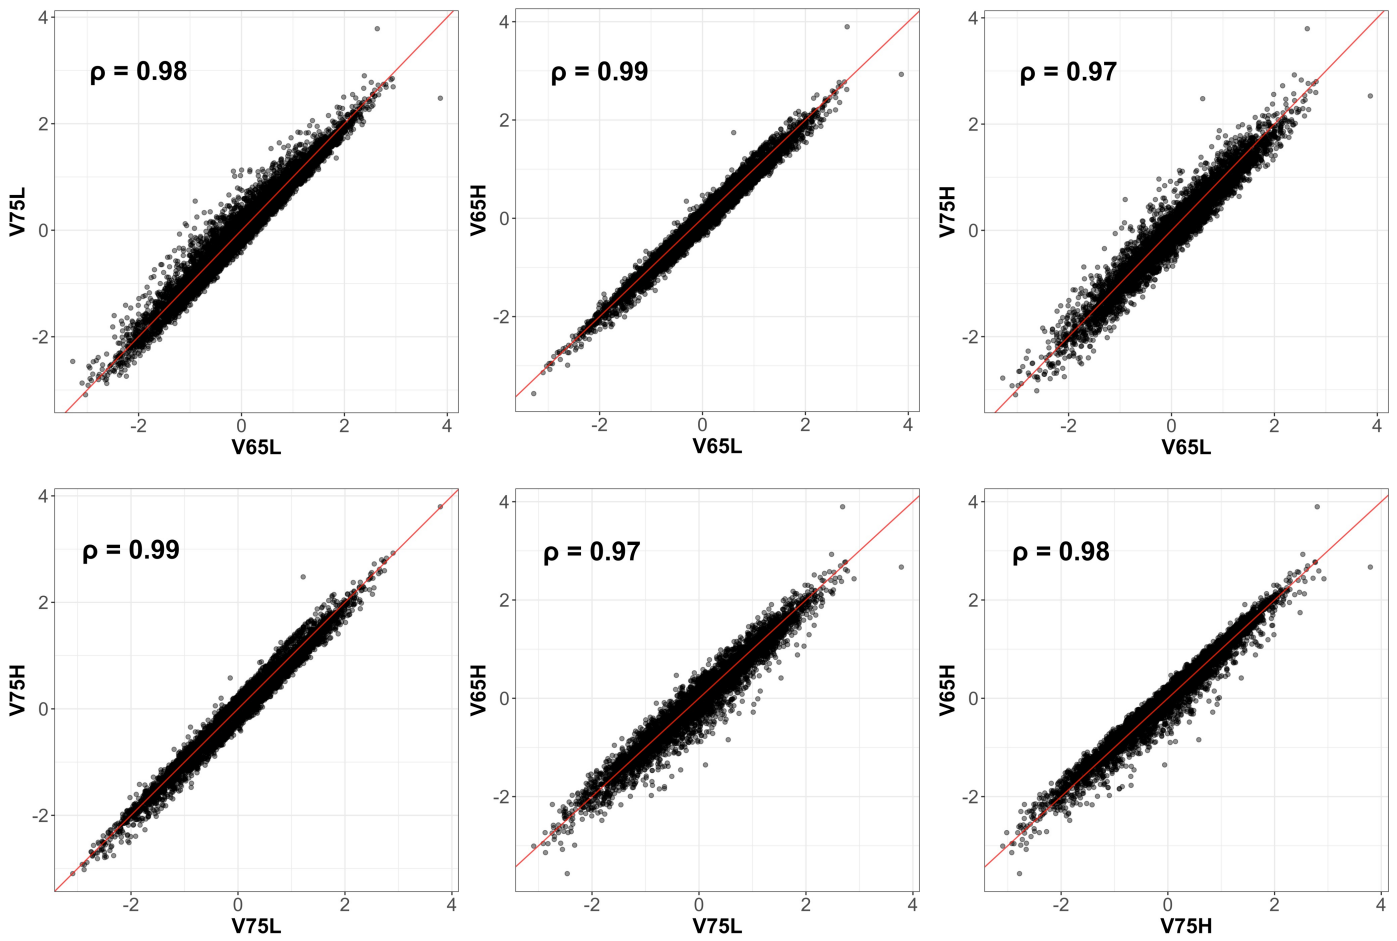

## b

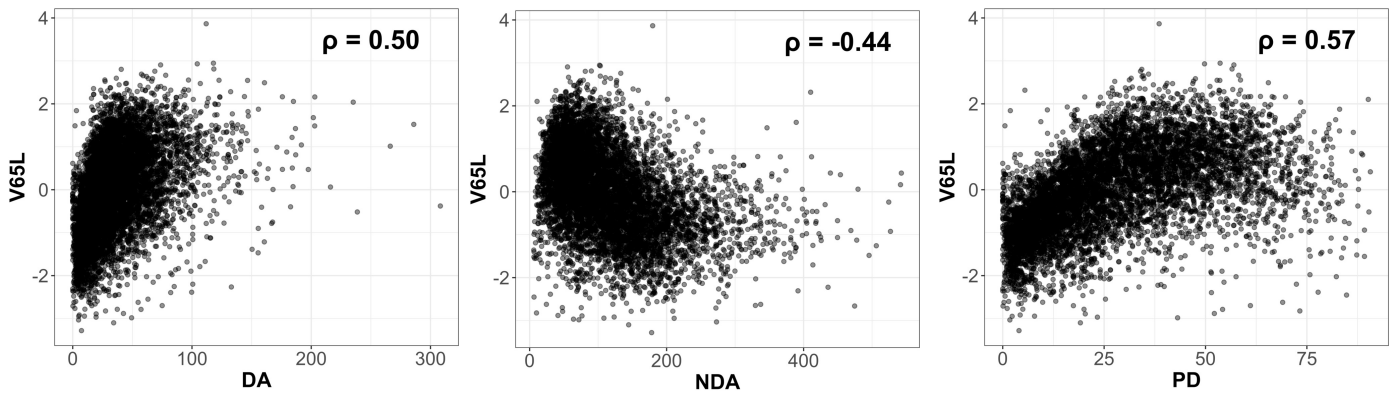



# Fig. 2

## a

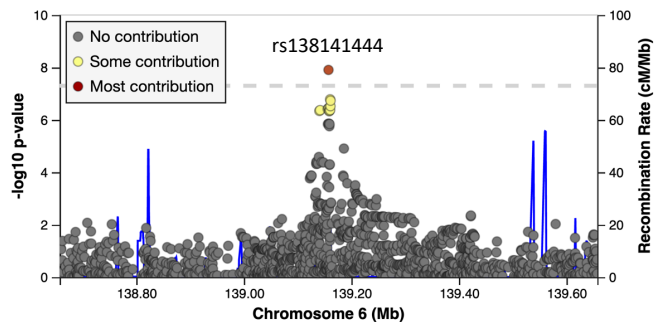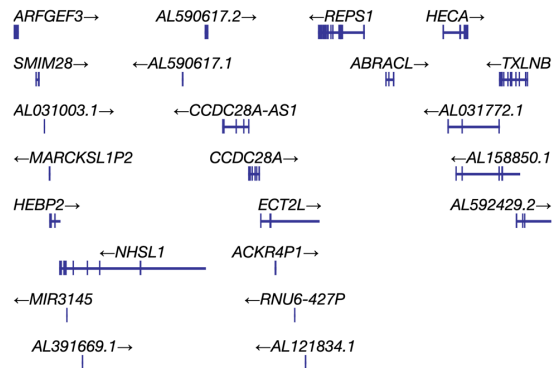

## b

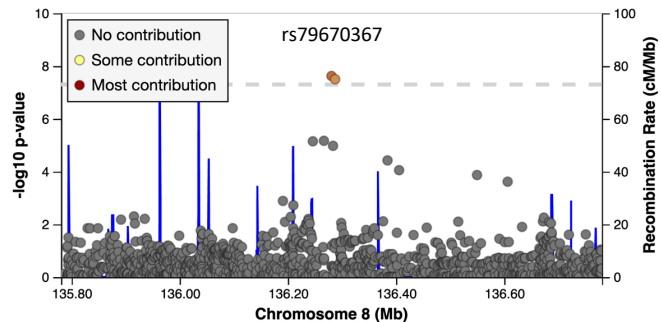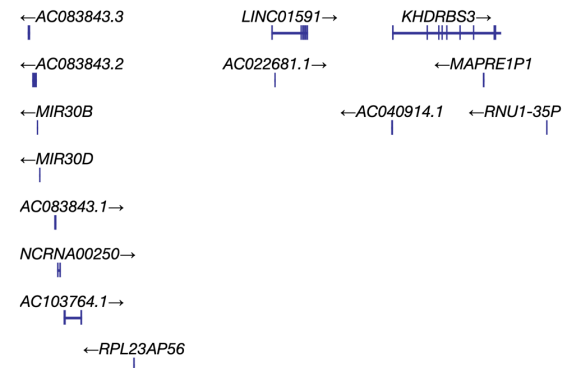

## c

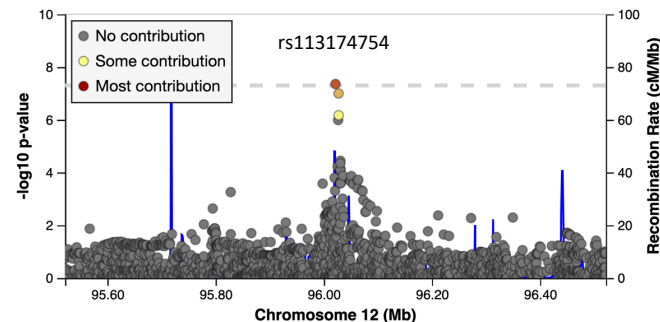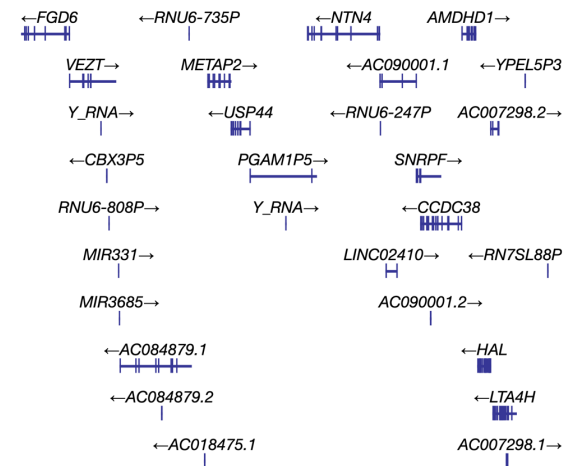

**Fig. 3****a**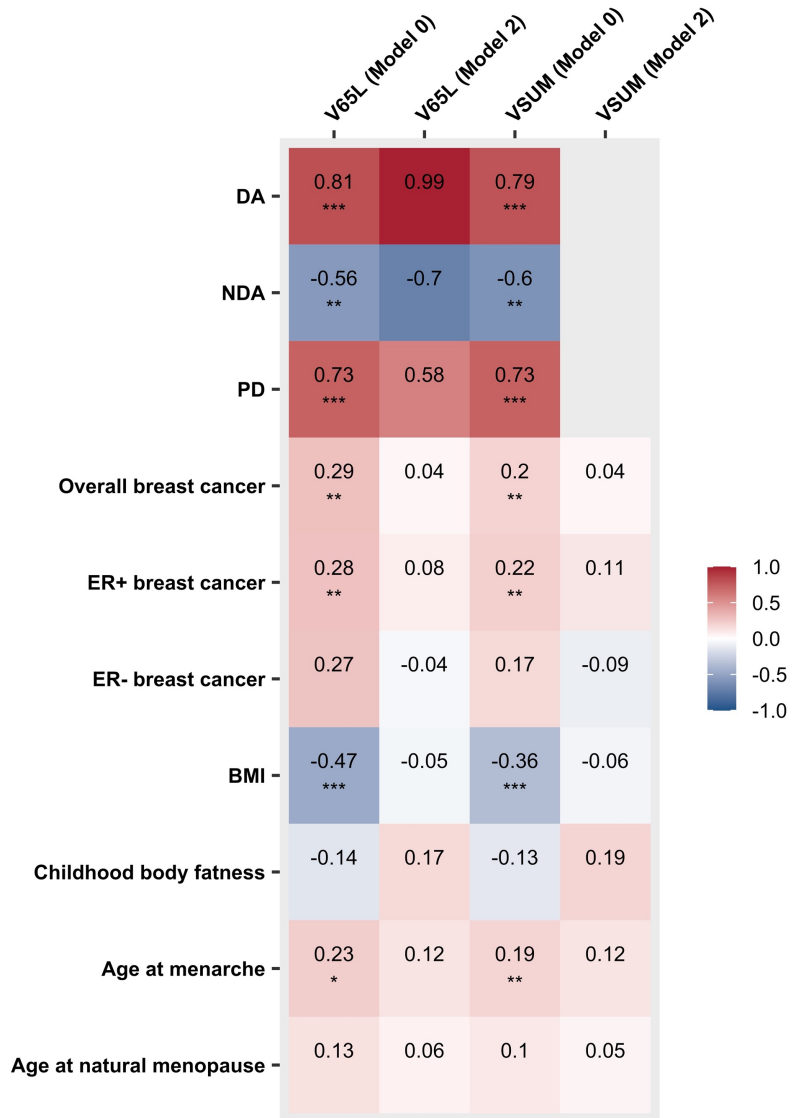**b**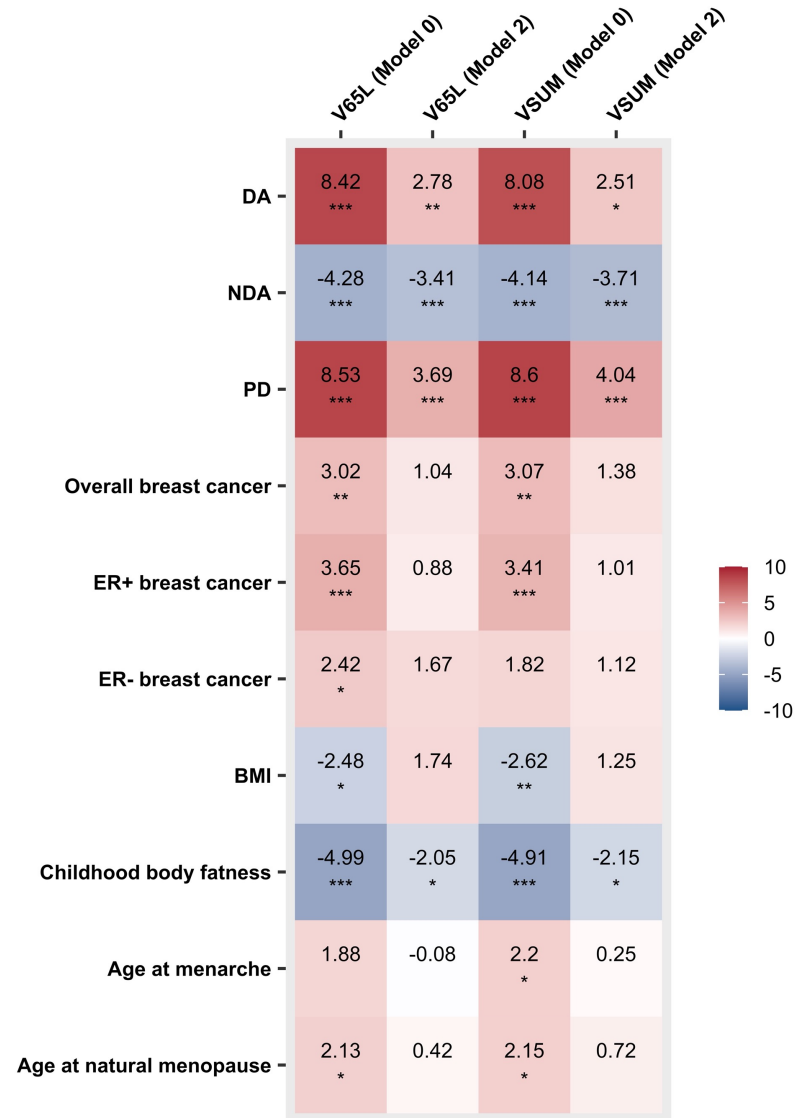

**Fig. 4**

**a**

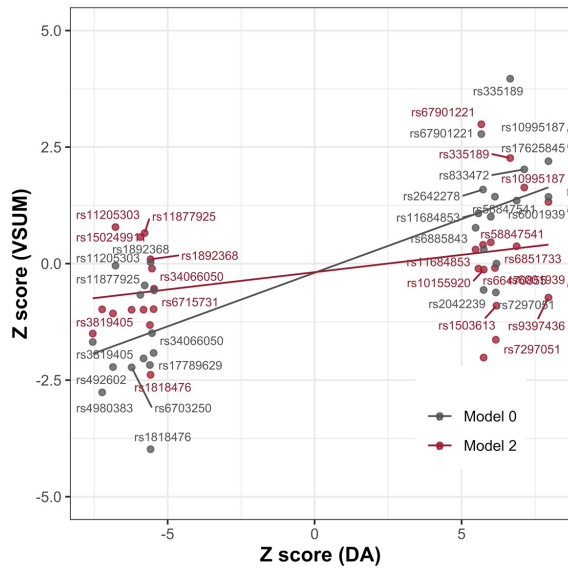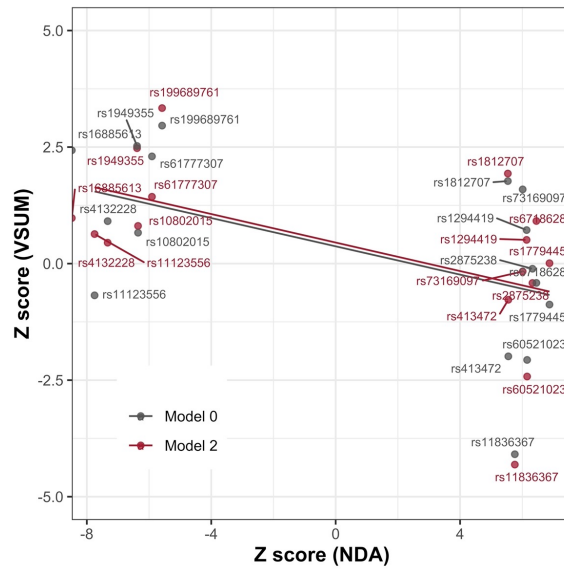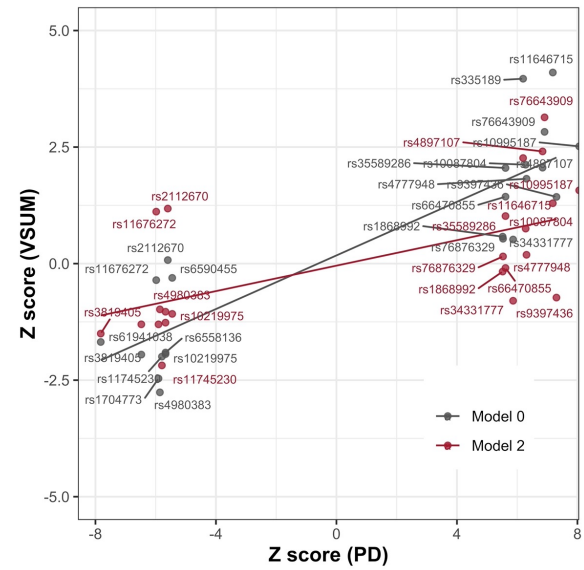

**b**

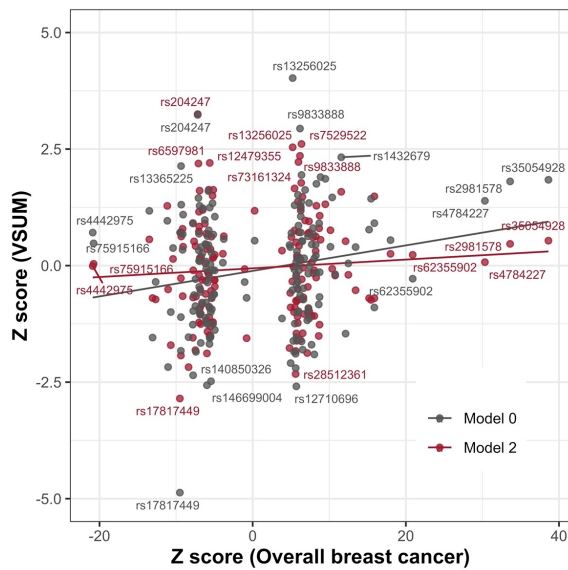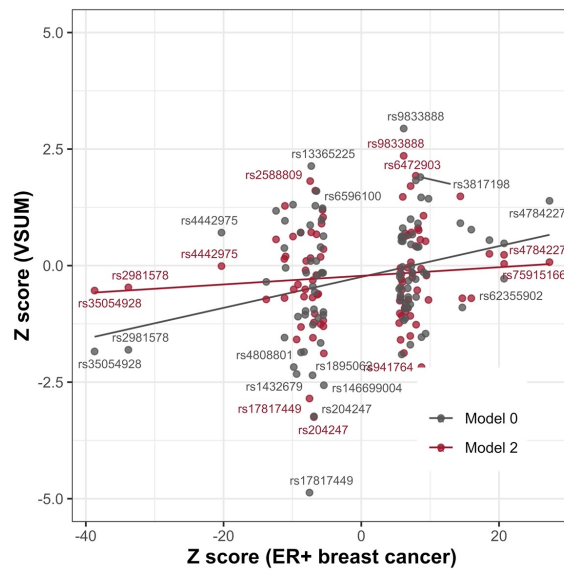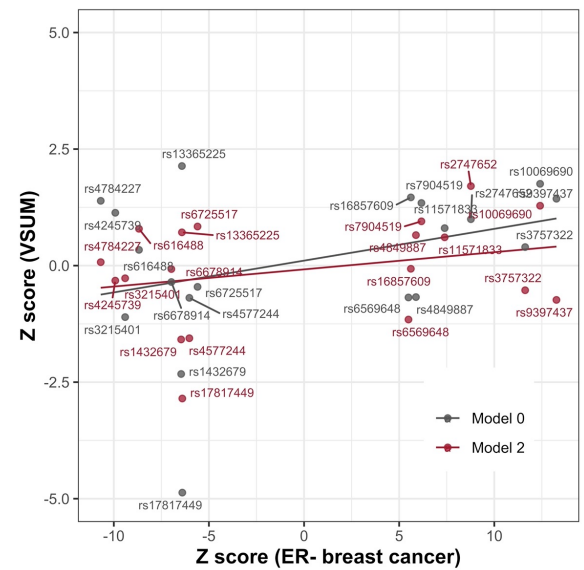

Source: https://www.medrxiv.org/content/10.1101/2022.07.25.22278024v1.full.pdf
